# Supplementary material for: Protein-Tyrosine Kinase Activity Profiling in Knock Down Zebrafish Embryos
Source: PLoS One. 2007 Jul 4;2(7):e581. doi: 10.1371/journal.pone.0000581 (PMC1895888; doi:10.1371/journal.pone.0000581)
Supplement: Table S1 — The positions of the peptides on the chip are indicated as well as their protein names, the amino acid residue numbers and the sequences of the peptides. Fluorescence intensities for all peptides were determined quantitatively and expressed as arbitrary units. Relative intensities were calculated within individual peptide chips to allow for comparison between different experiments. Averages of two independent experiments were determined and are expressed here as relative signal compared to the signal in wild type, non-injected control embryos (set to 100%). Absolute levels of fluorescence are indicated for wild type, non-injected control (arbitrary units). Signals below the detection threshold level are indicated by a -. The fluorescence intensities of the PTK activity profiles of purified Fyn and Yes are depicted in arbitrary units. (0.05 MB XLS) [file pone.0000581.s001.xls]

## Sheet: Rel. Int. all Peptides
Array
			Residues									Intensity (a.u.)
Row	Column	Protein Name	Start a.a.	Stop a.a.	Sequence	WntMorph	WntRescue	Fymorph	Fyrescue	Nacre	WT	WT	Fyn Kinase	Yes Kinase
2	2	41	348	660	CXLDGENIYIRHSNL	-	-	-	-	-	-	58	2541	4216
2	3	41	653	665	CXRLDGENIYIRHSN	-	-	-	-	-	-	54	2592	4281
2	4	ACHB	383	395	CXWGRGTDEYFIRKP	-	-	-	-	-	-	88	2740	3540
2	5	ACHD	383	395	CXYISKAEEYFLLKS	-	-	-	-	-	-	21	554	1543
2	6	AMPE	5	17	CXEREGSKRYCIQTK	-	-	-	-	-	-	0	933	148
2	7	ANXA1	13	25	CXIENEEQEYVQTVK	-	-	-	-	-	-	5	2549	7868
2	8	ANXA2	16	28	CXHSTPPSAYGSVKA	-	-	-	-	-	-	35	1475	5083
2	9	ART			EAIYAAPFAKKKXC	33.2662	71.735	53.8902	82.8556	116.959	100	612	13520	13127
2	10	B3AT	39	51	CXTEATATDYHTTSH	-	-	-	-	-	-	7	203	2148
2	11	CALM	93	105	CXFDKDGNGYISAAE	-	-	-	-	-	-	0	305	864
2	12	CALM	95	107	CXKDGNGYISAAELR	-	-	-	-	-	-	3	413	1977
2	13	CBL	693	705	CXEGEEDTEYMTPSS	-	-	-	-	-	-	0	414	3240
3	2	CD3Z	116	128	CXKDKMAEAYSEIGM	-	-	-	-	-	-	0	1023	9783
3	3	CD3Z	146	158	CXSTATKDTYDALHM	-	-	-	-	-	-	6	187	2165
3	4	CD79A	181	193	CXEYEDENLYEGLNL	27.3077	66.8462	30.9701	34.4527	123.043	100	67	10562	10570
3	5	CDK2	8	20	CXEKIGEGTYGVVYK	23.3811	69.4079	6.97115	26.4227	90.7664	100	351	24702	27582
3	6	CREB1	122	134	CXQKRREILSRRPSY	131.731	105.301	72.0617	82.8734	75.2851	100	56	5039	1822
3	7	CRK	214	226	CXGPPEPGPYAQPSV	-	-	-	-	-	-	22	0	1957
3	8	CTNB1	79	91	CXVADIDGQYAMTRA	-	-	-	-	-	-	5	871	4033
3	9	DCX	109	121	CXGIVYAVSSDRFRS	-	-	-	-	-	-	35	1765	2739
3	10	DDR1	506	518	CXLLLSNPAYRLLLA	-	-	-	-	-	-	0	0	0
3	11	DDR1	785	797	CXFGMSRNLYAGDYY	41.4241	83.7318	37.201	56.2998	64.4737	100	33	2065	3348
3	12	DDR2	733	745	CXRNLYSGDYYRIQG	90.4762	85.7143	40.0716	100.376	80.0258	100	65	2518	4228
3	13	DYR1A	212	224	CXKHDTEMKYYIVHL	-	-	-	-	-	-	0	625	1774
4	2	DYR1A	312	324	CXCQLGQRIYQYIQS	-	-	-	-	-	-	0	383	1132
4	3	EFS	246	258	CXGGTDEGIYDVPLL	21.6313	60.4355	18.5029	36.6151	104.069	100	2989	13308	24446
4	4	EGFR	1062	1074	CXEDSFLQRYSSDPT	-	-	-	-	-	-	3	266	434
4	5	EGFR	1103	1115	CXGSVQNPVYHNQPL	-	-	-	-	-	-	36	844	5840
4	6	EGFR	1118	1130	CXAPSRDPHYQDPHS	-	-	-	-	-	-	4	226	637
4	7	EGFR	1165	1177	CXISLDNPDYQQDFF	-	-	-	-	-	-	48	898	1469
4	8	EGFR	1190	1202	CXSTAENAEYLRVAP	-	-	-	-	-	-	30	570	2290
4	9	EGFR	862	874	CXLGAEEKEYHAEGG	-	-	-	-	-	-	1	0	1880
4	10	EGFR	908	920	CXMTFGSKPYDGIPA	-	-	-	-	-	-	0	0	783
4	11	ENOG	37	49	CXSGASTGIYEALEL	20.3903	60.9168	37.9243	59.7822	106.499	100	1409	20806	25592
4	12	EPHA1	774	786	CXLDDFDGTYETQGG	-	-	-	-	-	-	67	0	769
4	13	EPHA2	581	593	CXQLKPLKTYVDPHT	-	-	-	-	-	-	0	51	112
5	2	EPHA2	765	777	CXEDDPEATYTTSGG	0	9.18367	0	15.2174	128.522	100	115	12595	27233
5	3	EPHA4	589	601	CXLNQGVRTYVDPFT	-	-	-	-	-	-	14	1264	712
5	4	EPHA4	921	933	CXQAIKMDRYKDNFT	-	-	-	-	-	-	8	235	0
5	5	EPHA7	607	619	CXTYIDPETYEDPNR	0	40	1.08696	32.6288	93.0946	100	108	9597	27302
5	6	EPHB1	771	783	CXDDTSDPTYTSSLG	-	-	6.25	21.875	94.3756	100	80	6744	23496
5	7	EPHB1	921	933	CXSAIKMVQYRDSFL	-	-	-	-	-	-	9	352	0
5	8	EPHB4	583	595	CXIGHGTKVYIDPFT	-	-	-	-	-	-	17	1331	1269
5	9	EPOR	361	373	CXSEHAQDTYLVLDK	-	-	1.85185	21.6667	122.846	100	54	4008	15028
5	10	EPOR	419	431	CXASAASFEYTILDP	-	-	3.92157	21.5686	117.905	100	51	2709	11675
5	11	ERBB2	1241	1253	CXPTAENPEYLGLDV	-	-	25.5393	29.1217	110.227	100	59	3758	12193
5	12	ERBB2	870	882	CXLDIDETEYHADGG	-	-	-	-	-	-	17	2775	7727
5	13	ERBB2	945	957	CXPISTIDVYMIMVK	-	-	-	-	-	-	5	148	0
6	2	ERBB4	1181	1193	CXQALDNPEYHNASN	-	-	-	-	-	-	0	118	1567
6	3	ERBB4	1277	1289	CXIVAENPEYLSEFS	-	-	-	-	-	-	9	1244	1858
6	4	FABH	13	25	CXDSKNFDDYMKSLG	-	-	-	-	-	-	0	0	464
6	5	FAK1	569	581	CXRYMEDSTYYKASK	91.4352	83.3333	37.9148	26.0935	85.9615	100	51	2556	3485
6	6	FAK2	572	584	CXRYIEDEDYYKASV	44.197	53.3063	25.6007	51.6577	97.0892	100	91	6859	9570
6	7	FER	707	719	CXRQEDGGVYSSSGL	5	63.5	10.0988	32.9927	92.2329	100	137	9196	23533
6	8	FES	706	718	CXREEADGVYAASGG	1.31579	41.8169	5.37975	23.7342	93.844	100	158	12061	27248
6	9	FGFR1	759	771	CXALTSNQEYLDLSM	-	-	-	-	-	-	0	331	0
6	10	FGFR2	762	774	CXTLTTNEEYLDLSQ	-	-	-	-	-	-	14	605	717
6	11	FGFR3	641	653	CXDVHNLDYYKKTTN	-	-	-	-	-	-	5	160	226
6	12	FGFR3	753	765	CXTVTSTDEYLDLSA	-	-	-	-	-	-	5	586	1967
6	13	FRK	380	392	CXKVDNEDIYESRHE	8.77193	53.1465	1.70732	27.6358	109.821	100	205	23180	27583
7	2	GSK3B	209	221	CXRGEPNVSYICSRY	122.061	99.0699	50.6494	99.9026	81.878	100	70	3474	2058
7	3	INSR	1348	1360	CXSLGFKRSYEEHIP	-	-	-	-	-	-	17	913	852
7	4	INSR	993	1005	CXYASSNPEYLSASD	-	-	-	-	-	-	21	718	1605
7	5	IRS1	1222	1234	CXSSEDLSAYASISF	-	-	-	-	-	-	0	254	188
7	6	IRS2	535	545	CXGGGGGEFYGYMTM	-	-	-	-	-	-	0	542	811
7	7	JAK1	1015	1027	CXAIETDKEYYTVKD	-	-	-	-	-	-	39	2881	9453
7	8	K2C6E	53	65	CXGAGFGSRSLYGLG	58.8043	67.5676	31.3053	77.9014	55.9621	100	91	3248	5212
7	9	KSYK	518	530	CXALRADENYYKAQT	-	-	-	-	-	-	24	765	1788
7	10	LAT	194	206	CXMESIDDYVNVPES	-	-	10.2941	39.7059	52.9412	100	34	640	2227
7	11	LAT	249	261	CXEEGAPDYENLQEL	-	-	-	-	-	-	152	7392	19712
7	12	LCK	387	399	CXRLIEDNEYTAREG	-	-	-	-	-	-	0	4075	13477
7	13	LTK	669	681	CXRDIYRASYYRRGD	110.034	106.914	56.3095	91.7857	80.9653	100	140	6772	3132
8	2	MBP	198	210	CXARTAHYGSLPQKS	-	-	-	-	-	-	26	1636	2094
8	3	MBP	259	271	CXFGYGGRASDYKSA	-	-	-	-	-	-	25	898	566
8	4	MBP	263	275	CXGRASDYKSAHKGF	-	-	-	-	-	-	23	1303	203
8	5	MET	1227	1239	CXRDMYDKEYYSVHN	55.5653	72.3193	27.9099	53.6757	88.2955	100	111	5172	13142
8	6	MK01	180	192	CXHTGFLTEYVATRW	-	-	-	-	-	-	40	1526	1693
8	7	MK01	198	210	CXIMLNSKGYTKSID	-	-	-	-	-	-	0	0	0
8	8	MK07	211	223	CXAEHQYFMTEYVAT	-	-	-	-	-	-	21	1358	1830
8	9	MK10	216	228	CXTSFMMTPYVVTRY	70.2924	83.8596	34.7966	49.2034	89.3239	100	59	2073	4410
8	10	MK12	178	190	CXADSEMTGYVVTRW	-	-	-	-	-	-	10	1280	2448
8	11	MK14	173	185	CXRHTDDEMTGYVAT	-	-	-	-	-	-	9	254	1727
8	12	NTRK1	489	501	CXHIIENPQYFSDAC	-	-	-	-	-	-	17	2209	3816
8	13	NTRK2	509	521	CXPVIENPQYFGITN	-	-	-	-	-	-	0	0	118
9	2	NTRK2	695	707	CXFGMSRDVYSTDYY	41.3716	73.6523	12.6301	45.5282	93.2353	100	147	8953	16321
9	3	NTRK2	699	711	CXRDVYSTDYYRVGG	52.1332	78.8477	26.8021	59.5223	83.7069	100	162	7927	15967
9	4	P2AB	297	309	CXEPHVTRRTPDYFL	71.8944	80.4348	40.119	99.7619	99.2674	100	60	1631	1340
9	5	P85A	600	612	CXNENTEDQYSLVED	-	-	2.8777	20.5036	79.9172	100	139	19848	25441
9	6	PAXI	111	123	CXVGEEEHVYSFPNK	23.9626	61.0518	14.545	34.7934	101.614	100	323	23465	24828
9	7	PAXI	24	36	CXFLSEETPYSYPTG	25.2239	59.7933	28.8592	47.249	100.144	100	334	19020	25299
9	8	PDPK1	2	14	CXARTTSQLYDAVPI	16.1017	63.5901	32.0236	57.7549	94.8318	100	191	9266	18184
9	9	PDPK1	369	381	CXDEDCYGNYDNLLS	7.14286	25.8282	25.3623	33.2126	96.77	100	138	9625	19448
9	10	PECA1	706	718	CXKKDTETVYSEVRK	16.0714	66.6667	9.04762	36.9048	101.071	100	210	14680	27082
9	11	PERI	459	471	CXQRSELDKSSAHSY	-	-	-	-	-	-	1	378	594
9	12	PGFRB	1002	1014	CXLDTSSVLYTAVQP	-	-	3.7037	38.671	97.7513	100	34	862	4869
9	13	PGFRB	572	584	CXVSSDGHEYIYVDP	0	68.4706	12.5	43.4066	90.9501	100	91	13536	24330
10	2	PGFRB	709	721	CXRPPSAELYSNALP	-	-	15.625	33.125	108.214	100	80	2123	7608
10	3	PGFRB	768	780	CXSSNYMAPYDNYVP	-	-	21.8535	50.9725	57.8947	100	46	554	2081
10	4	PGFRB	771	783	CXYMAPYDNYVPSAP	-	-	31.2798	33.2273	96.9975	100	74	992	6033
10	5	PLCG1	1246	1258	CXEGSFESRYQQPFE	-	-	-	-	-	-	22	729	844
10	6	PLCG1	764	776	CXIGTAEPDYGALYE	15.2537	77.2177	13.701	44.7968	100.226	100	774	23230	24210
10	7	PLCG1	776	788	CXEGRNPGFYVEANP	-	-	-	-	-	-	0	1136	2811
10	8	PRGR	545	557	CXLRPDSEASQSPQY	-	-	-	-	-	-	352	0	674
10	9	PRGR	786	798	CXEQRMKESSFYSLC	7.63889	65.2778	15.7738	42.8571	86.7347	100	56	3642	7259
10	10	PRRX2	202	214	CXWTASSPYSTVPPY	47.3529	59.3978	30.7473	51.0746	89.5231	100	166	3126	12406
10	11	PTN11	535	547	CXSKRKGHEYTNIKY	86.7593	77.7315	49.2424	88.0125	84.902	100	33	2743	1358
10	12	RAF1	331	343	CXRPRGQRDSSYYWE	104.773	105.896	50.9926	81.5385	77.9175	100	130	6042	2881
10	13	RASA1	453	465	CXTVDGKEIYNTIRR	23.0233	80.8219	19.3845	55.6005	93.4232	100	139	6674	12600
11	2	RBL2	99	111	CXVPTVSKGTVEGNY	-	-	-	-	-	-	-1	0	1109
11	3	RET	1022	1034	CXTPSDSLIYDDGLS	0	61.0766	14.4935	24.4675	92.5353	100	175	15148	27394
11	4	RET	680	692	CXAQAFPVSYSSSGA	-	-	-	-	-	-	-1	574	972
11	5	RON	1346	1358	CXSALLGDHYVQLPA	-	-	22.7273	59.0909	50	100	44	1433	4392
11	6	RON	1353	1365	CXYVQLPATYMNLGP	-	-	26.1311	22.9508	78.4103	100	61	827	3821
11	7	SRC8	470	482	CXVSQREAEYEPETV	-	-	-	-	-	-	0	402	1570
11	8	SRC8	476	488	CXEYEPETVYEVAGA	15.5675	59.1994	17.0347	15.4574	107.527	100	0	12435	22703
11	9	SRC8	492	504	CXYQAEENTYDEYEN	17.2016	73.1988	12.7692	32.2564	110.274	100	325	23289	24733
11	10	STA5A	687	699	CXLAKAVDGYVKPQI	-	-	-	-	-	-	0	0	0
11	11	STAT1	694	706	CXDGPKGTGYIKTEL	-	-	-	-	-	-	0	0	0
11	12	STAT2	683	695	CXNLQERRKYLKHRL	105.962	100.346	78.0952	104.524	80	100	42	3142	307
11	13	STAT3	698	710	CXDPGSAAPYLKTKF	-	-	-	-	-	-	0	51	18
12	2	STAT4	686	698	CXTERGDKGYVPSVF	-	-	-	-	-	-	0	160	208
12	3	STAT4	714	726	CXPSDLLPMSPSVYA	-	-	-	-	-	-	12	1058	3377
12	4	STAT6	634	646	CXMGKDGRGYVPATI	-	-	-	-	-	-	0	0	0
12	5	SYN1	2	14	CXNYLRRRLSDSNFM	112.921	88.2217	60.9908	84.7619	80.3947	100	93	4345	792
12	6	TEC	512	524	CXRYFLDDQYTSSSG	49.8619	72.9867	15.9524	33.0392	89.1534	100	85	3442	7538
12	7	TYRO3	679	691	CXKIYSGDYYRQGCA	68.126	75.7006	41.3333	65.9612	80.5452	100	150	5871	5273
12	8	VEGFR1	1040	1052	CXDFGLARDIYKNPD	-	-	-	-	-	-	30	1390	2617
12	9	VEGFR1	1046	1058	CXDIFKNPDYVRKGD	-	-	-	-	-	-	0	152	0
12	10	VEGFR1	1049	1061	CXKNPDYVRKGDTRL	-	-	-	-	-	-	13	441	0
12	11	VEGFR1	1162	1174	CXVQQDGKDYIPINA	-	-	-	-	-	-	0	0	660
12	12	VEGFR1	1206	1218	CXGSSDDVRYVNAFK	-	-	-	-	-	-	7	449	571
12	13	VEGFR1	1235	1247	CXATSMFDDYQGDSS	-	-	-	-	-	-	0	308	1518
13	2	VEGFR1	1320	1332	CXSSSPPPDYNSVVL	-	-	-	-	-	-	0	0	0
13	3	VEGFR1	1326	1338	CXDYNSVVLYSTPPI	26	58	22.4247	43.0422	76.2805	100	83	4305	9532
13	4	VEGFR2	1046	1058	CXDFGLARDIYKDPD	-	-	-	-	-	-	7	2104	3240
13	5	VEGFR2	1052	1064	CXDIYKDPDYVRKGD	-	-	-	-	-	-	20	1588	2514
13	6	VEGFR2	1068	1080	CXAQQDGKDYIVLPI	-	-	-	-	-	-	35	449	2802
13	7	VEGFR2	1207	1219	CXVSDPKFHYDNTAG	-	-	-	-	-	-	0	0	698
13	8	VEGFR2	944	956	CXRFRQGKDYVGAIP	-	-	-	-	-	-	31	1320	118
13	9	VEGFR2	989	1001	CXEEAPEDLYKDFLT	0	18.8889	4.34314	20.8186	96.5177	100	136	9860	26850
13	10	VGFR3	1061	1073	CXDIYKDPDYVRKGS	-	-	-	-	-	-	9	905	1443
13	11	VINC	815	827	CXKSFLDSGYRILGA	-	-	-	-	-	-	15	550	774
13	12	ZAP70	485	497	CXALGADDSYYTARS	-	-	10	36.6667	75.7778	100	45	2529	7472
13	13	ZBT16	621	633	CXLRTHNGASPYQCT	-	-	0	47.1042	49.179	100	37	1956	2164
